# Supplementary material
Source: publisher site journal article supplement (https://www.spandidos-publications.com/1901/downloadSupplementary)
Supplement: Supplementary file 1 [file downloadSupplementary]

## Sheet: Sheet1
Table SII. Change of expression in mRNAs.
mRNA expressional difference	Expression average of tumor samples	Expression average of normal samples	id	TCGA-44-6144-11A-01R-1755-07	TCGA-44-6145-11A-01R-1858-07	TCGA-44-6778-11A-01R-1858-07	TCGA-44-5645-11A-01R-1628-07	TCGA-50-5931-11A-01R-1858-07	TCGA-49-6745-11A-01R-1858-07	TCGA-44-2662-11A-01R-1758-07	TCGA-50-5939-11A-01R-1628-07	TCGA-50-5935-11A-01R-1858-07	TCGA-50-5933-11A-01R-1755-07	TCGA-50-5936-11A-01R-1628-07	TCGA-44-6146-11A-01R-1858-07	TCGA-44-2655-11A-01R-1758-07	TCGA-50-8459-01A-11R-2326-07	TCGA-86-8281-01A-11R-2287-07	TCGA-50-5944-01A-11R-1755-07	TCGA-NJ-A4YF-01A-12R-A262-07	TCGA-69-8453-01A-12R-2326-07	TCGA-55-7573-01A-11R-2039-07	TCGA-49-4487-01A-21R-1858-07	TCGA-55-8511-01A-11R-2403-07	TCGA-55-8206-01A-11R-2241-07	TCGA-05-5428-01A-01R-1628-07	TCGA-49-6767-01A-11R-1858-07	TCGA-MP-A4SY-01A-21R-A24X-07	TCGA-L9-A8F4-01A-11R-A39D-07	TCGA-49-AAR4-01A-12R-A41B-07	TCGA-05-4410-01A-21R-1858-07	TCGA-NJ-A4YP-01A-11R-A262-07	TCGA-75-6214-01A-41R-1949-07	TCGA-55-7815-01A-11R-2170-07	TCGA-55-8085-01A-11R-2241-07	TCGA-44-3917-01A-01R-A278-07	TCGA-55-5899-01A-11R-1628-07	TCGA-69-A59K-01A-11R-A262-07	TCGA-99-8033-01A-11R-2241-07	TCGA-L9-A443-01A-12R-A24H-07	TCGA-35-5375-01A-01R-1628-07	TCGA-69-7761-01A-11R-2170-07	TCGA-44-2656-01B-06R-A277-07	TCGA-55-A48Y-01A-11R-A24H-07	TCGA-49-4488-01A-01R-1755-07	TCGA-95-7039-01A-11R-1949-07	TCGA-78-7145-01A-11R-2039-07	TCGA-86-8358-01A-11R-2326-07	TCGA-J2-A4AE-01A-21R-A24H-07
mRNAdown	8.27273	190.627	HOXA10	17	8	6	4	2	3	7	19	15	2	8	2	14	10	20	20	349	8	6	2	438	453	15	761	4	4	17	466	892	724	4	9	2	9	1	13	464	178	16	3	11	303	381	17	4	68
mRNAdown	162.636	2309.85	SLC7A11	150	97	242	80	205	55	165	91	61	384	259	100	276	976	6758	869	68	1334	303	270	3592	769	826	131	2169	145	216	44	3246	1239	2556	4877	2331	2355	3291	12688	217	1605	1011	1654	3119	2263	109	194	4398	2773
mRNAdown	25.1818	452.689	CCNE1	50	35	26	32	18	20	17	15	26	20	18	20	44	150	116	59	304	239	37	571	366	146	204	859	384	609	524	147	997	786	44	804	155	37	779	1735	168	220	228	41	385	117	109	245	704	476
[truncated: 332 more columns]
